# Supplementary material for: Development and characterization of phospho-ubiquitin antibodies to monitor PINK1-PRKN signaling in cells and tissue
Source: PubMed Central journal article supplement — bioRxiv. 2024 Jan 16:2024.01.15.575715. Preprint. [Version 1] doi: 10.1101/2024.01.15.575715 (PMC10827112; doi:10.1101/2024.01.15.575715), 2024-01-16
Supplement: media-1.pdf [file media-1.pdf]

## SUPPLEMENTARY MATERIAL

### Development and characterization of phospho-ubiquitin antibodies to monitor PINK1-PRKN signaling in cells and tissue

Jens O. Watzlawik<sup>1,#</sup>, Xu Hou<sup>1,#</sup>, Tyrique Richardson<sup>1</sup>, Szymon L. Lewicki<sup>1</sup>, Joanna Siuda<sup>2</sup>, Zbigniew K. Wszolek<sup>3</sup>, Casey N. Cook<sup>1,4</sup>, Leonard Petrucelli<sup>1,4</sup>, Michael DeTure<sup>1</sup>, Dennis W. Dickson<sup>1,4</sup>, Odetta Antico<sup>5</sup>, Miratul M. K. Muqit<sup>5</sup>, Jordan B. Fishman<sup>6</sup>, Karima Pirani<sup>7</sup>, Ravindran Kumaran<sup>8</sup>, Nicole K. Polinski<sup>9</sup>, Fabienne C. Fiesel<sup>1,4</sup>, and Wolfdieter Springer<sup>1,4\*</sup>

<sup>1</sup> Department of Neuroscience, Mayo Clinic, Jacksonville, FL 32224, USA

<sup>2</sup> Department of Neurology, Faculty of Medical Sciences in Katowice, Medical University of Silesia, Katowice 40-055, Poland

<sup>3</sup> Department of Neurology, Mayo Clinic, Jacksonville, FL 32224, USA

<sup>4</sup> Neuroscience PhD Program, Mayo Clinic Graduate School of Biomedical Sciences, Jacksonville, FL 32224, USA

<sup>5</sup> MRC Protein Phosphorylation and Ubiquitylation Unit, School of Life Sciences, University of Dundee, Dundee, DD1 5EH, United Kingdom

<sup>6</sup> 21st Century Biochemicals Inc., Marlborough, MA 01752, USA

<sup>7</sup> ImmunoPrecise Antibodies Ltd., Victoria, BC V8Z 7X8, Canada

<sup>8</sup> Abcam plc, Cambridge, CB2 0AX, United Kingdom

<sup>9</sup> The Michael J. Fox Foundation for Parkinson's Research, New York, NY 10163, USA

# Contributed equally

\* Correspondence should be addressed to:

Wolfdieter Springer, PhD

Department of Neuroscience; Mayo Clinic

4500 San Pablo Road, Jacksonville, FL 32224, USA

E-mail: [Springer.Wolfdieter@mayo.edu](mailto:Springer.Wolfdieter@mayo.edu)

Tel: +1 904 953 6129; Fax: +1 904 953 7117

**Running title:** Development of recombinant phospho-ubiquitin antibodies

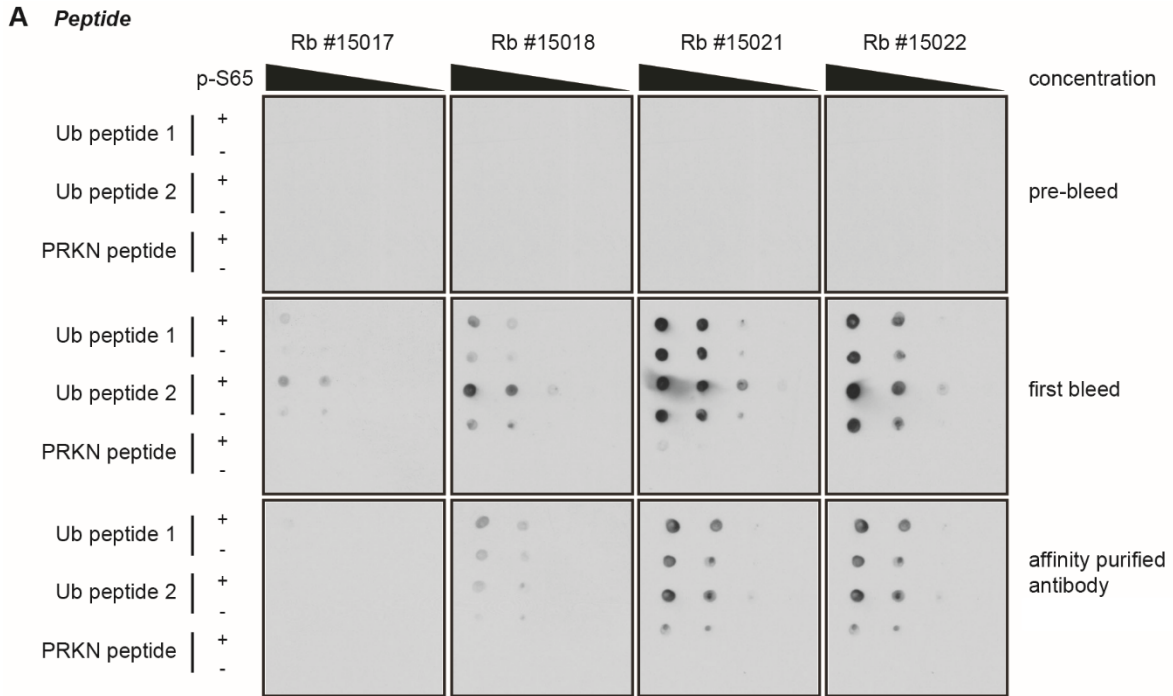

**B HEK293E cells**

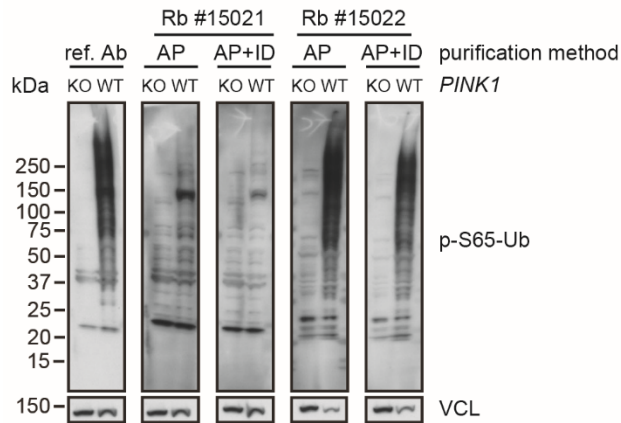

**Supplementary Figure 1. Identification of p-S65-Ub immunopositive bleeds in four rabbits.**

(A) Dot blot analyses to identify p-S65-Ub positive bleeds from immunized rabbits. Two sets of 13-mer p-S65-Ub peptides containing the p-S65 in its center position that were used for rabbit immunizations as well as negative controls from their non-phosphorylated counterparts and 12-mer non-/phosphorylated PRKN peptides containing the S65 in its center position were spotted

on membranes in different concentrations (0.2-25  $\mu$ M; 5-fold serial dilution). Blots were probed with rabbit sera from before immunization (pre-bleed), after immunization (first bleed), or after affinity-purification. **(B)** WT and *PINK1* KO HEK293E cells were treated for 8 h with 20  $\mu$ M CCCP and cell lysates were used for western blot analyses. Blots were probed with the reference antibody or bleeds from two rabbits (Rb #15021 and #15022) with either affinity purification (AP) alone or also immuno-depletion (AP+ID). VCL was used as loading control. Ref. Ab - reference antibody, AP - affinity purification, ID - immuno-depletion, KO - knockout, WT - wild-type.

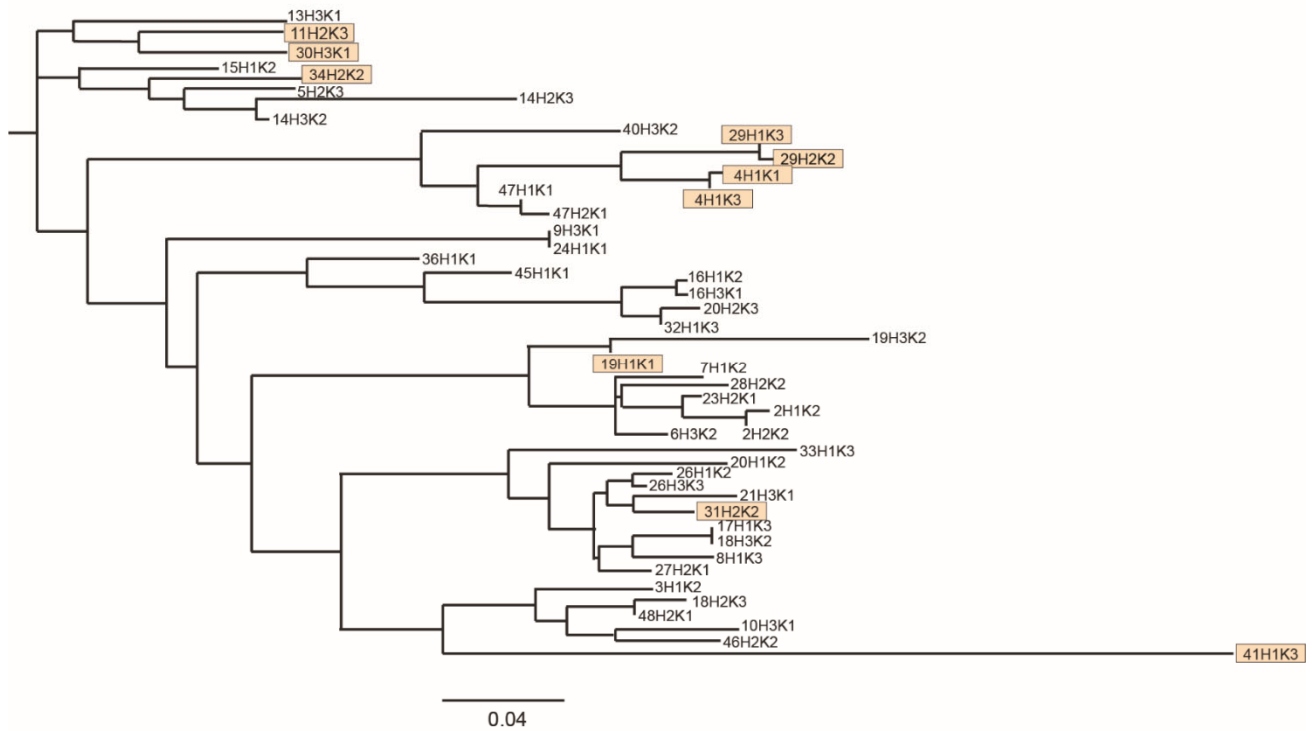

**Supplementary Figure 2. Phylogenetic sequence tree of p-S65-Ub clone variable region.**

A phylogenetic sequence tree was generated based on the p-S65-Ub antibody clone amino acid sequence for combined heavy and kappa variable regions. The top ten promising p-S65-Ub clone supernatants are highlighted in light orange. Scale bar: 0.04 nucleotide substitutions per site.

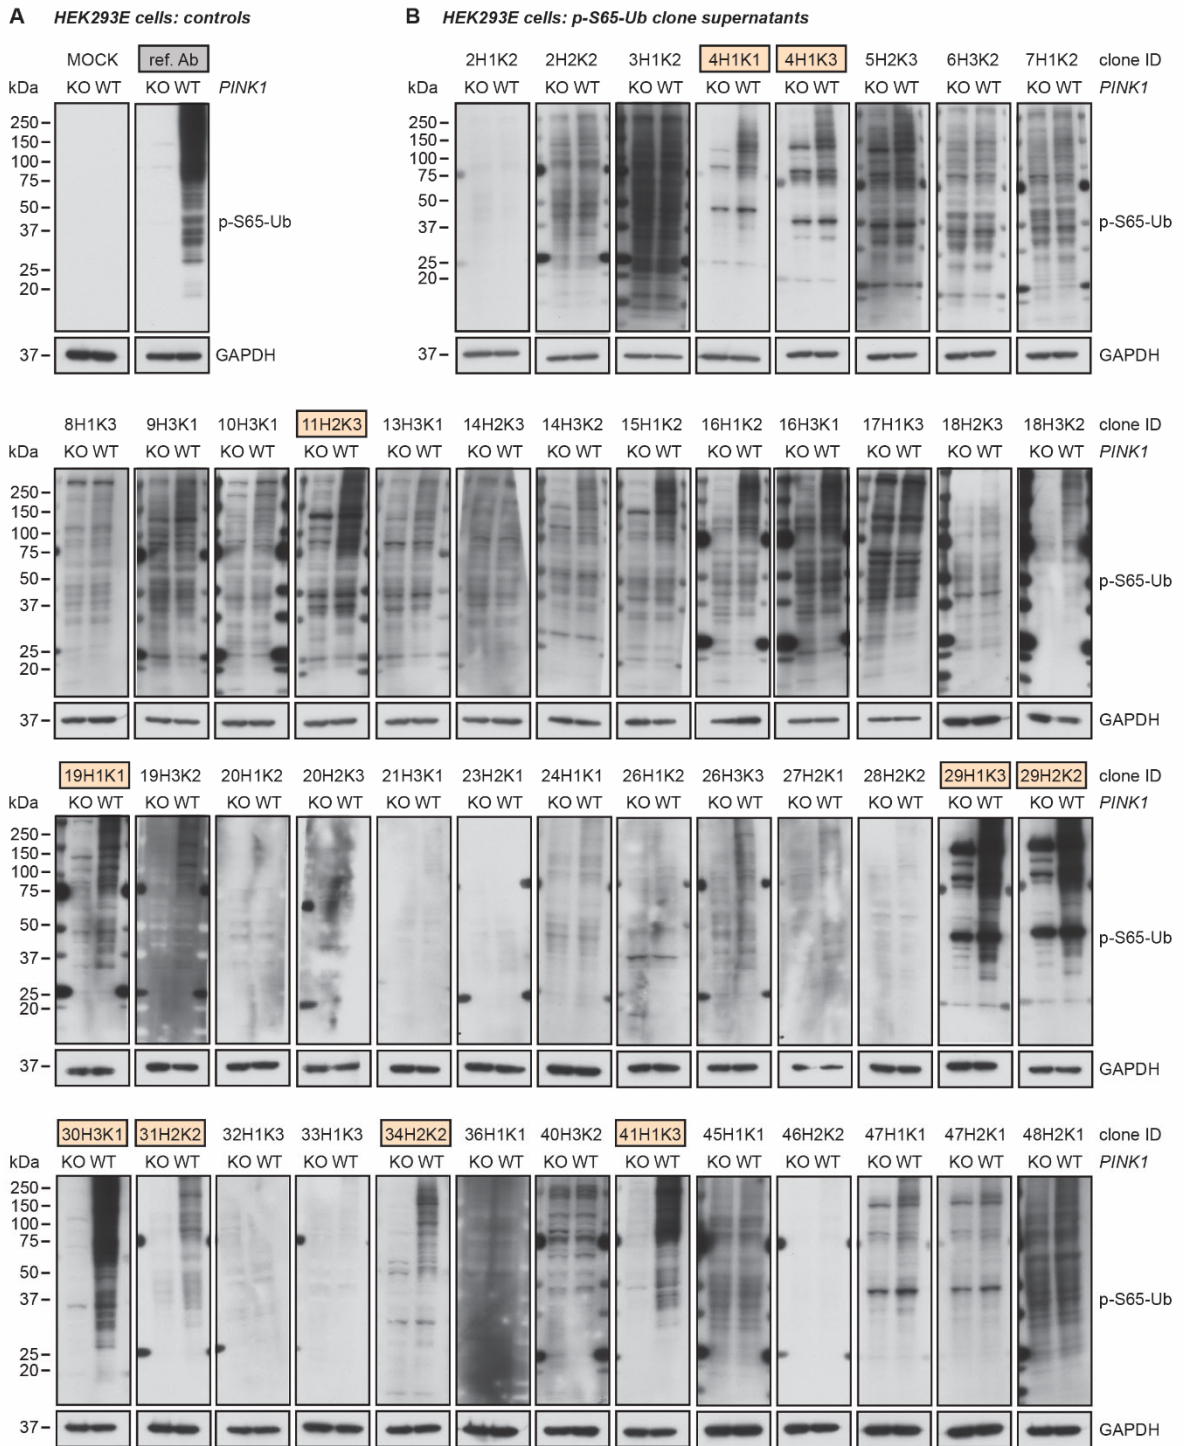

**Supplementary Figure 3. Western blot screening of top recombinant p-S65-Ub clone supernatants.** WT and *PINK1* KO HEK293E cells were treated for 24 h with 20  $\mu$ M CCCP and cell lysates were used for western blot analyses. **(A)** Representative western blot images from

supernatant produced by HEK293 cells transfected with a media control containing all media and transfection reagent except the plasmids (MOCK) vector that served as negative control or from the reference antibody that served as positive control. **(B)** Representative western blot images from 47 p-S65-Ub recombinant antibody supernatants. GAPDH was used as loading control. The top ten promising p-S65-Ub antibody clones are highlighted in light orange. ref. Ab - reference antibody, KO - knockout, WT - wild-type.

**A Human dermal fibroblasts**

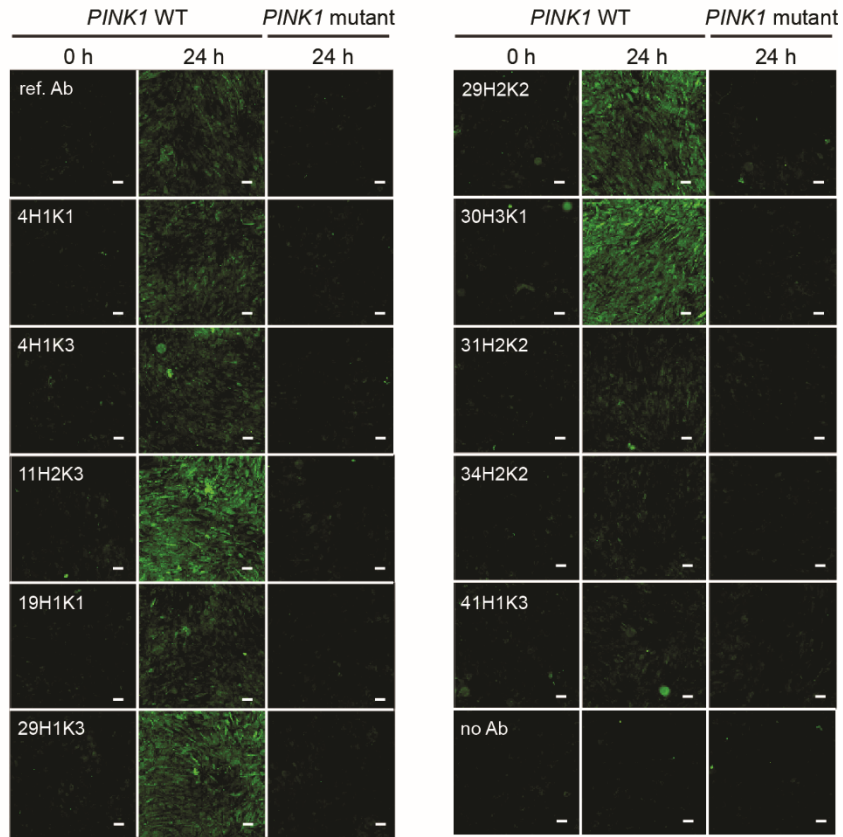

**B**

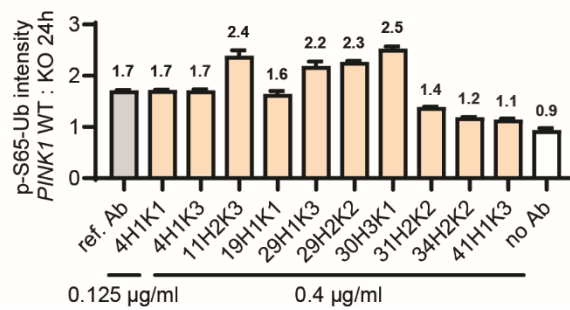

**Supplementary Figure 4. Characterization of the top recombinant p-S65-Ub clone supernatants for immunocytochemistry staining in human dermal fibroblasts.** All ten p-S65-Ub clone supernatants (0.4 µg/ml) and the reference antibody (0.125 µg/ml) were evaluated by immunocytochemistry in fibroblasts treated with 2 µM valinomycin for 0 or 24 hours. **(A)** Representative images of p-S65-Ub immunoreactive signals (green) in human primary skin

fibroblasts carrying WT or homozygous *PINK1*<sup>Q456X</sup> mutation. **(B)** Fluorescence intensities of each clone were quantified by high content imaging and compared relative to the treated *PINK1* mutant fibroblasts. Fold changes are labeled at the top of each bar. N = 2. Samples stained without primary antibody (no Ab) was used a negative control. Scale bar: 50  $\mu$ m. ref. Ab - reference antibody, WT - wild-type.



Supplementary Table 1. ELISA screening of B cell supernatants

| Ranking | B Cell ID          | ELISA detection for proteins or peptides |                          |                  |                          |                    |                            | Generated recombinant antibody clones |
|---------|--------------------|------------------------------------------|--------------------------|------------------|--------------------------|--------------------|----------------------------|---------------------------------------|
|         |                    | p-S65-Ub protein                         | Ub protein (non-phospho) | p-S65-Ub peptide | Ub peptide (non-phospho) | p-S65-PRKN peptide | PRKN peptide (non-phospho) |                                       |
| 1       | 19G7 <sup>1</sup>  | 2.269                                    | 0.054                    | 1.846            | 0.05                     | 0.05               | 0.049                      | -                                     |
| 2       | 10F4 <sup>1</sup>  | 2.262                                    | 0.051                    | 1.976            | 0.046                    | 0.047              | 0.048                      | 2H1K2, 2H2K2                          |
| 3       | 22A9 <sup>1</sup>  | 2.214                                    | 0.051                    | 1.979            | 0.048                    | 0.047              | 0.049                      | 3H1K2                                 |
| 4       | 22C1 <sup>1</sup>  | 2.192                                    | 0.056                    | 1.821            | 0.048                    | 0.048              | 0.048                      | 4H1K1, 4H1K3                          |
| 5       | 40C7 <sup>1</sup>  | 2.114                                    | 0.047                    | 1.794            | 0.05                     | 0.05               | 0.051                      | 5H2K3                                 |
| 6       | 4B3 <sup>1</sup>   | 2.107                                    | 0.046                    | 1.472            | 0.048                    | 0.048              | 0.053                      | 6H3K2                                 |
| 7       | 44B5 <sup>1</sup>  | 2.104                                    | 0.053                    | 1.909            | 0.161                    | 0.049              | 0.056                      | 7H1K2                                 |
| 8       | 11G6 <sup>1</sup>  | 2.085                                    | 0.051                    | 1.931            | 0.05                     | 0.052              | 0.049                      | 8H1K3                                 |
| 9       | 14D10 <sup>1</sup> | 2.049                                    | 0.053                    | 1.62             | 0.049                    | 0.049              | 0.049                      | 9H3K1                                 |
| 10      | 2E1 <sup>1</sup>   | 2.045                                    | 0.049                    | 1.577            | 0.052                    | 0.047              | 0.06                       | 10H3K1                                |
| 11      | 22H5 <sup>1</sup>  | 2.016                                    | 0.05                     | 1.92             | 0.051                    | 0.047              | 0.055                      | 11H2K3                                |
| 12      | 44D8 <sup>1</sup>  | 2.003                                    | 0.048                    | 2.005            | 0.132                    | 0.051              | 0.052                      | -                                     |
| 13      | 5A6 <sup>1</sup>   | 1.988                                    | 0.049                    | 1.591            | 0.047                    | 0.048              | 0.05                       | 13H3K1                                |
| 14      | 24H10 <sup>1</sup> | 1.986                                    | 0.051                    | 1.51             | 0.052                    | 0.05               | 0.051                      | 14H2K3, 14H3K2                        |
| 15      | 44D11 <sup>1</sup> | 1.975                                    | 0.05                     | 1.866            | 0.165                    | 0.05               | 0.052                      | 15H1K2                                |
| 16      | 15F8 <sup>1</sup>  | 1.974                                    | 0.05                     | 1.594            | 0.049                    | 0.048              | 0.049                      | 16H1K2, 16H3K1                        |
| 17      | 5D6 <sup>1</sup>   | 1.963                                    | 0.049                    | 1.661            | 0.051                    | 0.048              | 0.055                      | 17H1K3                                |
| 18      | 41E10 <sup>1</sup> | 1.948                                    | 0.047                    | 1.811            | 0.048                    | 0.048              | 0.049                      | 18H2K3, 18H3K2                        |
| 19      | 1F4 <sup>1</sup>   | 1.933                                    | 0.049                    | 1.451            | 0.049                    | 0.049              | 0.051                      | 19H1K1, 19H3K2                        |
| 20      | 4E10 <sup>1</sup>  | 1.92                                     | 0.049                    | 1.507            | 0.049                    | 0.047              | 0.054                      | 20H1K2, 20H2K3                        |
| 21      | 14C2 <sup>1</sup>  | 1.9                                      | 0.049                    | 1.781            | 0.05                     | 0.048              | 0.056                      | 21H3K1                                |
| 22      | 23C11 <sup>1</sup> | 1.875                                    | 0.05                     | 1.539            | 0.049                    | 0.049              | 0.049                      | -                                     |
| 23      | 44E1 <sup>1</sup>  | 1.87                                     | 0.052                    | 1.689            | 0.077                    | 0.071              | 0.05                       | 23H2K1                                |
| 24      | 8B3 <sup>1</sup>   | 1.865                                    | 0.047                    | 1.635            | 0.049                    | 0.052              | 0.05                       | 24H1K1                                |
| 25      | 9F8 <sup>1</sup>   | 1.854                                    | 0.048                    | 1.4              | 0.046                    | 0.048              | 0.049                      | -                                     |
| 26      | 24A7 <sup>1</sup>  | 1.823                                    | 0.052                    | 1.608            | 0.048                    | 0.052              | 0.052                      | 26H3K3, 26H3K3                        |
| 27      | 1D1 <sup>1</sup>   | 1.818                                    | 0.048                    | 1.556            | 0.047                    | 0.048              | 0.05                       | 27H2K1                                |
| 28      | 7D6 <sup>1</sup>   | 1.817                                    | 0.051                    | 1.311            | 0.052                    | 0.049              | 0.058                      | 28H2K2                                |
| 29      | 3C11 <sup>1</sup>  | 1.803                                    | 0.051                    | 1.584            | 0.048                    | 0.049              | 0.05                       | 29H1K3, 29H2K2                        |
| 30      | 34E2 <sup>1</sup>  | 1.788                                    | 0.049                    | 1.819            | 0.054                    | 0.053              | 0.051                      | 30H3K1                                |
| 31      | 15E3 <sup>1</sup>  | 1.772                                    | 0.055                    | 1.296            | 0.05                     | 0.049              | 0.053                      | 31H2K2                                |
| 32      | 28D5 <sup>1</sup>  | 1.771                                    | 0.052                    | 1.009            | 0.048                    | 0.049              | 0.049                      | 32H1K3                                |
| 33      | 15E9 <sup>1</sup>  | 1.771                                    | 0.049                    | 0.728            | 0.053                    | 0.048              | 0.056                      | 33H1K3                                |
| 34      | 27E3 <sup>1</sup>  | 1.762                                    | 0.05                     | 1.486            | 0.048                    | 0.05               | 0.049                      | 34H2K2                                |
| 35      | 6H7 <sup>1</sup>   | 1.758                                    | 0.069                    | 1.229            | 0.182                    | 0.049              | 0.053                      | -                                     |
| 36      | 28H <sup>1</sup>   | 1.73                                     | 0.047                    | 1.651            | 0.054                    | 0.049              | 0.07                       | 36H1K1                                |
| 37      | 2G5 <sup>2</sup>   | 0.635                                    | 0.105                    | 0.084            | 0.048                    | 0.047              | 0.049                      | -                                     |
| 38      | 5C10 <sup>2</sup>  | 0.443                                    | 0.046                    | 0.149            | 0.049                    | 0.048              | 0.05                       | -                                     |
| 39      | 37G1 <sup>2</sup>  | 0.433                                    | 0.049                    | 0.157            | 0.048                    | 0.05               | 0.053                      | -                                     |
| 40      | 2B1 <sup>2</sup>   | 0.423                                    | 0.048                    | 0.052            | 0.048                    | 0.048              | 0.047                      | 40H3K2                                |
| 41      | 3F8 <sup>3</sup>   | 1.754                                    | 0.047                    | 1.367            | 0.067                    | 1.831              | 0.062                      | 41H1K3                                |
| 42      | 17G4 <sup>3</sup>  | 1.449                                    | 0.05                     | 0.602            | 0.072                    | 1.25               | 0.071                      | -                                     |
| 43      | 6B8 <sup>3</sup>   | 1.072                                    | 0.065                    | 0.45             | 0.053                    | 0.711              | 0.053                      | -                                     |
| 44      | 21E11 <sup>3</sup> | 0.715                                    | 0.052                    | 0.221            | 0.05                     | 0.335              | 0.053                      | -                                     |
| 45      | 30G3 <sup>4</sup>  | 0.727                                    | 0.047                    | 0.497            | 0.047                    | 0.046              | 0.048                      | 45H1K1                                |
| 46      | 25B9 <sup>4</sup>  | 1.023                                    | 0.049                    | 0.68             | 0.046                    | 0.047              | 0.047                      | 46H2K2                                |
| 47      | 31A7 <sup>4</sup>  | 1.019                                    | 0.049                    | 0.856            | 0.048                    | 0.049              | 0.051                      | 47H1K1, 47H2K1                        |
| 48      | 37F1 <sup>4</sup>  | 0.95                                     | 0.048                    | 0.903            | 0.048                    | 0.051              | 0.051                      | 48H2K1                                |
|         | 44A3               | 2.387                                    | 0.062                    | 2.243            | 0.453                    | 0.048              | 0.053                      |                                       |
|         | 44B6               | 2.322                                    | 0.055                    | 2.091            | 0.476                    | 0.058              | 0.06                       |                                       |
|         | 44B3               | 2.292                                    | 0.057                    | 2.217            | 1.157                    | 0.059              | 0.077                      |                                       |
|         | 44B7               | 2.288                                    | 0.051                    | 2.031            | 0.896                    | 0.051              | 0.058                      |                                       |
|         | 5D2                | 2.207                                    | 0.051                    | 1.955            | 0.49                     | 0.049              | 0.052                      |                                       |
|         | 44C6               | 2.202                                    | 0.051                    | 1.956            | 0.35                     | 0.05               | 0.055                      |                                       |
|         | 44C4               | 2.199                                    | 0.052                    | 1.881            | 0.253                    | 0.05               | 0.056                      |                                       |
|         | 5C6                | 2.169                                    | 0.568                    | 1.912            | 0.566                    | 0.049              | 0.049                      |                                       |
|         | 44D2               | 2.117                                    | 0.065                    | 1.929            | 1.472                    | 0.061              | 0.07                       |                                       |
|         | 44D5               | 2.093                                    | 0.25                     | 2.09             | 1.409                    | 0.348              | 0.283                      |                                       |
|         | 44C5               | 2.09                                     | 0.055                    | 1.637            | 0.215                    | 0.048              | 0.058                      |                                       |

| Ranking | B Cell ID | ELISA detection for proteins or peptides |                          |                  |                          |                    |                            | Generated recombinant antibody clones |
|---------|-----------|------------------------------------------|--------------------------|------------------|--------------------------|--------------------|----------------------------|---------------------------------------|
|         |           | p-S65-Ub protein                         | Ub protein (non-phospho) | p-S65-Ub peptide | Ub peptide (non-phospho) | p-S65-PRKN peptide | PRKN peptide (non-phospho) |                                       |
|         | 44B4      | 2.083                                    | 0.05                     | 1.952            | 1.48                     | 0.048              | 0.053                      |                                       |
|         | 10G11     | 2.073                                    | 0.276                    | 1.816            | 0.691                    | 0.22               | 0.415                      |                                       |
|         | 44G7      | 2.06                                     | 0.063                    | 2.079            | 0.843                    | 0.051              | 0.055                      |                                       |
|         | 44F9      | 2.048                                    | 0.052                    | 1.765            | 1.547                    | 0.049              | 0.051                      |                                       |
|         | 44A4      | 2.039                                    | 0.057                    | 2.203            | 2.06                     | 0.053              | 0.052                      |                                       |
|         | 44F6      | 2.03                                     | 0.052                    | 1.849            | 1.551                    | 0.049              | 0.055                      |                                       |
|         | 44A1      | 1.942                                    | 0.081                    | 1.97             | 0.459                    | 0.051              | 0.054                      |                                       |
|         | 31B7      | 1.926                                    | 0.051                    | 1.872            | 0.387                    | 0.059              | 0.072                      |                                       |
|         | 44C8      | 1.925                                    | 0.049                    | 2.083            | 1.998                    | 0.05               | 0.055                      |                                       |
|         | 44F8      | 1.906                                    | 0.05                     | 1.809            | 1.433                    | 0.05               | 0.052                      |                                       |
|         | 44F10     | 1.798                                    | 0.05                     | 1.593            | 0.372                    | 0.05               | 0.051                      |                                       |
|         | 31D10     | 1.739                                    | 0.048                    | 1.146            | 0.048                    | 0.048              | 0.048                      |                                       |
|         | 12B6      | 1.728                                    | 0.048                    | 1.253            | 0.048                    | 0.049              | 0.049                      |                                       |
|         | 34H4      | 1.719                                    | 0.048                    | 1.445            | 0.048                    | 0.054              | 0.049                      |                                       |
|         | 18D5      | 1.664                                    | 0.049                    | 1.387            | 0.051                    | 0.048              | 0.053                      |                                       |
|         | 44E9      | 1.661                                    | 0.05                     | 1.945            | 0.197                    | 0.055              | 0.063                      |                                       |
|         | 3H8       | 1.658                                    | 0.046                    | 1.25             | 0.047                    | 0.047              | 0.049                      |                                       |
|         | 44F4      | 1.645                                    | 0.053                    | 1.854            | 1.031                    | 1.401              | 1.023                      |                                       |
|         | 27A6      | 1.621                                    | 0.064                    | 1.413            | 0.05                     | 0.049              | 0.048                      |                                       |
|         | 22A8      | 1.602                                    | 0.057                    | 0.922            | 0.064                    | 0.051              | 0.06                       |                                       |
|         | 39D5      | 1.571                                    | 0.048                    | 1.135            | 0.048                    | 0.049              | 0.049                      |                                       |
|         | 3D1       | 1.55                                     | 0.047                    | 1.103            | 0.048                    | 0.05               | 0.049                      |                                       |
|         | 11H6      | 1.535                                    | 0.048                    | 0.94             | 0.047                    | 0.047              | 0.048                      |                                       |
|         | 6B6       | 1.529                                    | 0.048                    | 1.676            | 0.102                    | 0.049              | 0.052                      |                                       |
|         | 31C2      | 1.528                                    | 0.047                    | 0.961            | 0.049                    | 0.049              | 0.051                      |                                       |
|         | 44H8      | 1.518                                    | 0.051                    | 0.833            | 0.094                    | 0.05               | 0.053                      |                                       |
|         | 44C7      | 1.508                                    | 0.056                    | 1.922            | 2.093                    | 0.059              | 0.057                      |                                       |
|         | 28C4      | 1.507                                    | 0.051                    | 1.023            | 0.053                    | 0.048              | 0.052                      |                                       |
|         | 44F3      | 1.481                                    | 0.085                    | 1.664            | 1.298                    | 0.361              | 0.055                      |                                       |
|         | 44B9      | 1.469                                    | 0.053                    | 1.445            | 0.97                     | 0.051              | 0.056                      |                                       |
|         | 44C11     | 1.466                                    | 0.052                    | 1.585            | 0.775                    | 0.054              | 0.055                      |                                       |
|         | 1B11      | 1.458                                    | 0.047                    | 0.837            | 0.05                     | 0.048              | 0.054                      |                                       |
|         | 25B11     | 1.448                                    | 0.05                     | 0.912            | 0.048                    | 0.049              | 0.049                      |                                       |
|         | 15G10     | 1.438                                    | 0.049                    | 0.981            | 0.049                    | 0.05               | 0.05                       |                                       |
|         | 21B9      | 1.434                                    | 0.048                    | 1.429            | 1.254                    | 0.049              | 0.06                       |                                       |
|         | 13D4      | 1.428                                    | 0.051                    | 0.815            | 0.061                    | 0.051              | 0.057                      |                                       |
|         | 39E5      | 1.415                                    | 0.047                    | 0.549            | 0.048                    | 0.048              | 0.05                       |                                       |
|         | 44A11     | 1.41                                     | 0.059                    | 1.768            | 1.005                    | 0.051              | 0.054                      |                                       |
|         | 44G10     | 1.407                                    | 0.05                     | 1.175            | 0.056                    | 0.048              | 0.049                      |                                       |
|         | 35D10     | 1.395                                    | 0.048                    | 1.419            | 0.05                     | 0.05               | 0.047                      |                                       |
|         | 37G3      | 1.395                                    | 0.048                    | 0.715            | 0.056                    | 0.048              | 0.05                       |                                       |
|         | 32B2      | 1.393                                    | 0.046                    | 1.448            | 0.046                    | 0.049              | 0.047                      |                                       |
|         | 19G9      | 1.373                                    | 0.05                     | 1.046            | 0.049                    | 0.049              | 0.049                      |                                       |
|         | 30H4      | 1.356                                    | 0.047                    | 1.14             | 0.048                    | 0.048              | 0.05                       |                                       |
|         | 1H3       | 1.347                                    | 0.048                    | 0.763            | 0.05                     | 0.049              | 0.048                      |                                       |
|         | 25D10     | 1.342                                    | 0.051                    | 0.904            | 0.049                    | 0.052              | 0.051                      |                                       |
|         | 29C11     | 1.331                                    | 0.049                    | 1                | 0.049                    | 0.048              | 0.049                      |                                       |
|         | 37D10     | 1.326                                    | 0.047                    | 1.389            | 0.05                     | 0.054              | 0.049                      |                                       |
|         | 28D7      | 1.322                                    | 0.058                    | 0.937            | 0.048                    | 0.048              | 0.05                       |                                       |
|         | 2B11      | 1.322                                    | 0.048                    | 0.675            | 0.047                    | 0.047              | 0.054                      |                                       |
|         | 44C1      | 1.31                                     | 0.052                    | 2.059            | 0.053                    | 0.05               | 0.049                      |                                       |
|         | 24A10     | 1.304                                    | 0.05                     | 0.654            | 0.048                    | 0.048              | 0.048                      |                                       |
|         | 13A8      | 1.302                                    | 0.049                    | 0.652            | 0.05                     | 0.051              | 0.055                      |                                       |
|         | 28F11     | 1.3                                      | 0.047                    | 1.21             | 0.05                     | 0.047              | 0.055                      |                                       |
|         | 11B3      | 1.292                                    | 0.048                    | 0.782            | 0.05                     | 0.047              | 0.051                      |                                       |
|         | 33A5      | 1.268                                    | 0.049                    | 0.764            | 0.05                     | 0.051              | 0.05                       |                                       |
|         | 20G5      | 1.245                                    | 0.049                    | 0.631            | 0.047                    | 0.049              | 0.053                      |                                       |
|         | 35D5      | 1.241                                    | 0.047                    | 1.073            | 0.07                     | 0.061              | 0.05                       |                                       |
|         | 22E9      | 1.233                                    | 0.052                    | 0.758            | 0.048                    | 0.047              | 0.047                      |                                       |
|         | 44A2      | 1.163                                    | 0.055                    | 1.709            | 1.69                     | 0.054              | 0.133                      |                                       |
|         | 44E4      | 1.153                                    | 0.078                    | 2.08             | 1.758                    | 0.101              | 0.134                      |                                       |
|         | 3G1       | 1.146                                    | 0.047                    | 0.681            | 0.134                    | 0.048              | 0.053                      |                                       |
|         | 10F10     | 1.141                                    | 0.049                    | 0.771            | 0.049                    | 0.077              | 0.05                       |                                       |
|         | 11C1      | 1.141                                    | 0.047                    | 0.512            | 0.049                    | 0.048              | 0.048                      |                                       |
|         | 32D1      | 1.109                                    | 0.047                    | 0.954            | 0.051                    | 0.047              | 0.05                       |                                       |
|         | 24F4      | 1.106                                    | 0.047                    | 0.687            | 0.048                    | 0.049              | 0.048                      |                                       |
|         | 2H6       | 1.097                                    | 0.048                    | 0.671            | 0.048                    | 0.05               | 0.049                      |                                       |
|         | 22B6      | 1.096                                    | 0.051                    | 0.433            | 0.048                    | 0.05               | 0.057                      |                                       |

| Ranking | B Cell ID | ELISA detection for proteins or peptides |                          |                  |                          |                    |                            | Generated recombinant antibody clones |
|---------|-----------|------------------------------------------|--------------------------|------------------|--------------------------|--------------------|----------------------------|---------------------------------------|
|         |           | p-S65-Ub protein                         | Ub protein (non-phospho) | p-S65-Ub peptide | Ub peptide (non-phospho) | p-S65-PRKN peptide | PRKN peptide (non-phospho) |                                       |
|         | 27C9      | 1.069                                    | 0.048                    | 0.88             | 0.047                    | 0.048              | 0.049                      |                                       |
|         | 25H5      | 1.067                                    | 0.051                    | 0.65             | 0.051                    | 0.049              | 0.049                      |                                       |
|         | 40D5      | 1.054                                    | 0.062                    | 0.352            | 0.049                    | 0.049              | 0.075                      |                                       |
|         | 42H10     | 1.041                                    | 0.046                    | 0.516            | 0.052                    | 0.051              | 0.05                       |                                       |
|         | 8H4       | 1.012                                    | 0.047                    | 0.313            | 0.048                    | 0.048              | 0.051                      |                                       |
|         | 44E2      | 0.929                                    | 0.061                    | 1.819            | 1.53                     | 0.05               | 0.066                      |                                       |
|         | 29G9      | 0.91                                     | 0.047                    | 0.347            | 0.05                     | 0.047              | 0.048                      |                                       |
|         | 44H1      | 0.899                                    | 0.049                    | 1.518            | 1.054                    | 0.047              | 0.051                      |                                       |
|         | 12F1      | 0.877                                    | 0.049                    | 0.372            | 0.046                    | 0.049              | 0.052                      |                                       |
|         | 44B10     | 0.861                                    | 0.054                    | 0.571            | 0.056                    | 0.05               | 0.049                      |                                       |
|         | 38A11     | 0.861                                    | 0.048                    | 0.479            | 0.047                    | 0.051              | 0.047                      |                                       |
|         | 9E6       | 0.858                                    | 0.771                    | 1.027            | 1.033                    | 0.663              | 1.155                      |                                       |
|         | 18D8      | 0.854                                    | 0.05                     | 0.215            | 0.048                    | 0.049              | 0.048                      |                                       |
|         | 44F7      | 0.846                                    | 0.051                    | 0.597            | 0.272                    | 0.05               | 0.06                       |                                       |
|         | 21G2      | 0.837                                    | 0.054                    | 0.259            | 0.047                    | 0.051              | 0.053                      |                                       |
|         | 4B4       | 0.823                                    | 0.05                     | 0.334            | 0.047                    | 0.048              | 0.048                      |                                       |
|         | 44H6      | 0.759                                    | 0.054                    | 1.533            | 0.398                    | 0.058              | 0.061                      |                                       |
|         | 44D6      | 0.751                                    | 0.053                    | 1.351            | 0.784                    | 1.1                | 0.432                      |                                       |
|         | 30A10     | 0.712                                    | 0.047                    | 0.37             | 0.048                    | 0.048              | 0.048                      |                                       |
|         | 28H8      | 0.666                                    | 0.048                    | 0.34             | 0.048                    | 0.048              | 0.055                      |                                       |
|         | 44B8      | 0.655                                    | 0.052                    | 1.553            | 0.376                    | 0.048              | 0.058                      |                                       |
|         | 25H10     | 0.629                                    | 0.048                    | 0.244            | 0.046                    | 0.049              | 0.047                      |                                       |
|         | 34G11     | 0.607                                    | 0.047                    | 0.223            | 0.051                    | 0.049              | 0.069                      |                                       |
|         | 35A7      | 0.595                                    | 0.046                    | 0.202            | 0.049                    | 0.047              | 0.047                      |                                       |
|         | 44G8      | 0.576                                    | 0.05                     | 1.236            | 0.89                     | 0.54               | 0.068                      |                                       |
|         | 44E6      | 0.568                                    | 0.05                     | 0.392            | 0.061                    | 0.048              | 0.054                      |                                       |
|         | 44G9      | 0.523                                    | 0.049                    | 1.757            | 1.494                    | 0.049              | 0.051                      |                                       |
|         | 44E5      | 0.507                                    | 0.053                    | 2.122            | 0.446                    | 0.05               | 0.052                      |                                       |
|         | 28C5      | 0.464                                    | 0.049                    | 0.276            | 0.048                    | 0.05               | 0.057                      |                                       |
|         | 30E6      | 0.444                                    | 0.046                    | 0.628            | 0.401                    | 0.05               | 0.05                       |                                       |
|         | 44G3      | 0.437                                    | 0.061                    | 0.177            | 0.077                    | 0.055              | 0.054                      |                                       |
|         | 44H7      | 0.415                                    | 0.054                    | 1.48             | 0.713                    | 0.051              | 0.053                      |                                       |
|         | 25A6      | 0.414                                    | 0.051                    | 0.168            | 0.05                     | 0.048              | 0.05                       |                                       |
|         | 10G5      | 0.391                                    | 0.051                    | 0.17             | 0.049                    | 0.13               | 0.053                      |                                       |
|         | 44G6      | 0.381                                    | 0.055                    | 1.474            | 0.753                    | 0.05               | 0.053                      |                                       |
|         | 44H9      | 0.37                                     | 0.054                    | 0.187            | 0.051                    | 0.214              | 0.05                       |                                       |
|         | 4A11      | 0.355                                    | 0.047                    | 0.101            | 0.046                    | 0.049              | 0.048                      |                                       |
|         | 39B1      | 0.335                                    | 0.047                    | 0.116            | 0.056                    | 0.051              | 0.049                      |                                       |
|         | 31E4      | 0.325                                    | 0.047                    | 0.098            | 0.048                    | 0.048              | 0.047                      |                                       |
|         | 29D6      | 0.296                                    | 0.047                    | 0.15             | 0.049                    | 0.047              | 0.047                      |                                       |
|         | 44C3      | 0.25                                     | 0.054                    | 1.48             | 0.973                    | 0.067              | 0.059                      |                                       |
|         | 5C8       | 0.242                                    | 0.046                    | 0.096            | 0.048                    | 0.049              | 0.048                      |                                       |
|         | 27E4      | 0.233                                    | 0.051                    | 0.133            | 0.051                    | 0.048              | 0.049                      |                                       |
|         | 44E7      | 0.173                                    | 0.063                    | 1.279            | 1.279                    | 0.049              | 0.064                      |                                       |
|         | 25F2      | 0.165                                    | 0.051                    | 0.092            | 0.051                    | 0.049              | 0.048                      |                                       |
|         | 27A8      | 0.153                                    | 0.051                    | 0.083            | 0.046                    | 0.047              | 0.05                       |                                       |
|         | 44G1      | 0.149                                    | 0.215                    | 1.189            | 0.352                    | 0.09               | 0.145                      |                                       |
|         | 44H5      | 0.147                                    | 0.056                    | 1.647            | 0.915                    | 0.049              | 0.058                      |                                       |
|         | 2F6       | 0.143                                    | 0.047                    | 0.696            | 0.812                    | 0.065              | 0.194                      |                                       |
|         | 32F5      | 0.135                                    | 0.048                    | 0.06             | 0.049                    | 0.048              | 0.049                      |                                       |
|         | 44C2      | 0.124                                    | 0.05                     | 0.787            | 0.162                    | 0.05               | 0.053                      |                                       |
|         | 44H10     | 0.12                                     | 0.05                     | 0.083            | 0.049                    | 0.048              | 0.048                      |                                       |
|         | 44F5      | 0.104                                    | 0.064                    | 1.678            | 1.269                    | 0.076              | 0.136                      |                                       |
|         | 44B2      | 0.097                                    | 0.062                    | 0.749            | 0.491                    | 0.049              | 0.055                      |                                       |
|         | 44D7      | 0.081                                    | 0.056                    | 0.766            | 0.334                    | 0.051              | 0.052                      |                                       |
|         | 44G11     | 0.069                                    | 0.083                    | 0.823            | 0.277                    | 0.104              | 0.122                      |                                       |
|         | 44H2      | 0.061                                    | 0.048                    | 1.194            | 0.42                     | 0.047              | 0.05                       |                                       |
|         | 44A8      | 0.06                                     | 0.055                    | 1.718            | 1.216                    | 0.077              | 0.079                      |                                       |
|         | 44A7      | 0.06                                     | 0.095                    | 0.494            | 0.164                    | 0.053              | 0.053                      |                                       |
|         | 44E3      | 0.059                                    | 0.05                     | 0.425            | 0.05                     | 0.049              | 0.05                       |                                       |
|         | 44E10     | 0.059                                    | 0.059                    | 0.898            | 0.237                    | 0.053              | 0.055                      |                                       |
|         | 44B11     | 0.056                                    | 0.054                    | 1.695            | 1.533                    | 0.057              | 0.073                      |                                       |
|         | 44D1      | 0.054                                    | 0.05                     | 1.109            | 1.09                     | 0.05               | 0.051                      |                                       |
|         | 44H4      | 0.054                                    | 0.052                    | 0.237            | 0.113                    | 0.048              | 0.051                      |                                       |
|         | 44D3      | 0.053                                    | 0.05                     | 1.757            | 1.686                    | 0.051              | 0.056                      |                                       |
|         | 44F11     | 0.052                                    | 0.051                    | 2.096            | 0.544                    | 0.052              | 0.058                      |                                       |
|         | 44D10     | 0.052                                    | 0.051                    | 1.615            | 0.258                    | 0.05               | 0.052                      |                                       |
|         | 44B1      | 0.052                                    | 0.049                    | 1.422            | 1.055                    | 0.073              | 0.115                      |                                       |

| Ranking | B Cell ID | ELISA detection for proteins or peptides |                          |                  |                          |                    |                            |  | Generated recombinant antibody clones |
|---------|-----------|------------------------------------------|--------------------------|------------------|--------------------------|--------------------|----------------------------|--|---------------------------------------|
|         |           | p-S65-Ub protein                         | Ub protein (non-phospho) | p-S65-Ub peptide | Ub peptide (non-phospho) | p-S65-PRKN peptide | PRKN peptide (non-phospho) |  |                                       |
|         | 44D4      | 0.052                                    | 0.052                    | 1.09             | 0.967                    | 0.05               | 0.056                      |  |                                       |
|         | 44F1      | 0.052                                    | 0.051                    | 0.874            | 0.545                    | 0.051              | 0.063                      |  |                                       |
|         | 44F2      | 0.052                                    | 0.052                    | 0.941            | 0.398                    | 0.047              | 0.055                      |  |                                       |
|         | 44H3      | 0.052                                    | 0.049                    | 0.196            | 0.092                    | 0.048              | 0.113                      |  |                                       |
|         | 14E7      | 0.052                                    | 0.052                    | 0.047            | 0.047                    | 0.052              | 0.048                      |  |                                       |
|         | 44G4      | 0.051                                    | 0.052                    | 1.726            | 0.976                    | 0.05               | 0.052                      |  |                                       |
|         | 44A6      | 0.051                                    | 0.053                    | 1.227            | 0.373                    | 0.056              | 0.065                      |  |                                       |
|         | 44H11     | 0.051                                    | 0.05                     | 1.136            | 0.489                    | 0.049              | 0.051                      |  |                                       |
|         | 44G5      | 0.05                                     | 0.053                    | 1.877            | 0.775                    | 0.049              | 0.056                      |  |                                       |
|         | 39G9      | 0.05                                     | 0.051                    | 0.048            | 0.046                    | 0.048              | 0.048                      |  |                                       |
|         | 44E8      | 0.049                                    | 0.057                    | 1.777            | 0.979                    | 0.069              | 0.085                      |  |                                       |
|         | 44E11     | 0.049                                    | 0.051                    | 1.683            | 1.547                    | 0.049              | 0.056                      |  |                                       |
|         | 44G2      | 0.049                                    | 0.072                    | 1.195            | 0.121                    | 0.049              | 0.05                       |  |                                       |
|         | 44D9      | 0.049                                    | 0.049                    | 0.116            | 0.059                    | 0.05               | 0.052                      |  |                                       |
|         | 44C9      | 0.049                                    | 0.05                     | 0.091            | 0.065                    | 0.049              | 0.082                      |  |                                       |
|         | 44C10     | 0.048                                    | 0.05                     | 0.272            | 0.049                    | 0.048              | 0.049                      |  |                                       |
|         | 44A10     | 0.048                                    | 0.049                    | 0.13             | 0.047                    | 0.05               | 0.049                      |  |                                       |
|         | 44A5      | 0.048                                    | 0.049                    | 0.158            | 0.072                    | 0.049              | 0.051                      |  |                                       |
|         | 39G11     | 0.048                                    | 0.063                    | 0.047            | 0.048                    | 0.049              | 0.058                      |  |                                       |
|         | 44A9      | 0.047                                    | 0.05                     | 1.48             | 0.269                    | 0.053              | 0.051                      |  |                                       |

Ub - ubiquitin, "-" - clone not available.

<sup>1</sup> B cells that detect both p-S65-Ub protein and peptide.

<sup>2</sup> B cells that only detect p-S65-Ub protein but not peptide.

<sup>3</sup> B cells that detect both p-S65-Ub protein and peptide but additionally also recognize p-S65-PRKN peptide.

<sup>4</sup> B cells that weakly detect p-S65-Ub protein and peptide.
